# Supplementary material
Source: PubMed Central journal article supplement (PMC4851347)
Supplement: NIHMS686694-supplement-S1.pdf [file NIHMS686694-supplement-S1.pdf]

## Supplementary Material

**Supplementary Figure 1. FGF-dependent induction and early patterning of *Ciona* anterior neural tissue.** (A-C) Schematics of neural plate development from 32- to 110-cell stages. Upper diagrams show simplified embryos with cells of interest highlighted. Lower diagrams show expression of key patterning genes within the future neural plate. Numbers indicate cell names using the nomenclature of Conklin. Only right-sided blastomeres are labeled, but names apply to their contralateral partners as well. (A) Anterior neural tissue is induced at the 32-cell stage by FGF9 from vegetal blastomeres. (B) At the 64-cell stage, *Dmrt* is induced in the six precursors of the anterior neural plate. (C) By the 112-cell stage, the anterior neural boundary (ANB) has been established between the *ZicL*<sup>+</sup> cells (anterior neural tube) and the *FoxC*<sup>+</sup> cells (presumptive palps, OSP, neurogenic ectoderm).

**Supplementary Figure 2. Sequential requirement for MEK in early neural plate patterning.** (A-C) Embryos were electroporated with *ZicL*>*LacZ* and *Dmrt*>*H2B:YFP*, treated with DMSO (A) or U0126 at 76-cell (B) or 112-cell (C) stages, and fixed at mid-gastrula for *in situ* hybridization and immunohistochemistry. (A) In control embryos, *ZicL* and *Dmrt* reporters are co-expressed in rows III and IV. *Six3/6* is restricted to row IV. (B) U0126 treatment at 76-cell stage results in loss of *ZicL* reporter expression in rows III and IV and loss of *Six3/6* expression. (C) U0126 treatment at 112-cell stage results in normal expression of *ZicL* reporter and a poster expansion of *Six3/6* into row III.

**Supplementary Figure 3. Expression of ETS family transcription factors in the neural plate.** (A-C) Embryos were electroporated with *ZicL*>*LacZ* and *Dmrt*>*YFP-CaaX*, then fixed at

mid-gastrula or neurula stages and assayed for expression of *Ets1/2* or *Elk1/3/4* by *in situ* hybridization with immunohistochemistry. Lower panels show *in situ* hybridization channel alone for clarity. (A,A') *Ets1/2* is expressed throughout the neural plate at mid-gastrula stage. (B,B') At early neurula stage, *Ets1/2* expression is more restricted, with strongest expression in the lateral a9.50 cells of row IV. (C,C') *Elk1/3/4* is expressed in rows I, III, and IV of the mid-gastrula neural plate, but excluded from row II.

**Supplementary Figure 4. (A)** Schematic of *Ets1/2* and *Elk1/3/4* proteins. *Ets1/2* consists of a C-terminal ETS DNA-binding domain and a SAM/Pointed protein-protein interaction domain from residues 182-265. *Elk1/3/4* has an N-terminal ETS DNA-binding domain. Domain predictions were made using SMART (<http://smart.embl-heidelberg.de/>—Schultz et al., 1998; <http://smart.embl-heidelberg.de/>). Yellow and blue boxes indicate residues used in *Ets1/2* -and *Elk1/3/4* fusion proteins, respectively. **(B)** Alignment of *Ets1/2* and *Elk1/3/4* proteins. Purple shading indicates identical residues, pink shading indicates similar residues, and unshaded residues are not conserved. Underlined residues indicate those included in fusion proteins. Red line indicates core ETS domain. *Ets1/2* and *Elk1/3/4* are ~65% identical within this region. Alignment was generated using T-Coffee Espresso (Armougom et al., 2006; <http://www.tcoffee.org>).

Formatted: Line spacing: Double

**A** Mid Gastrula

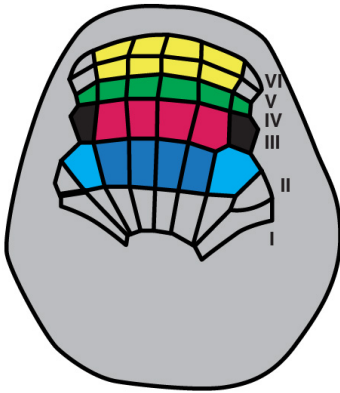

**B**

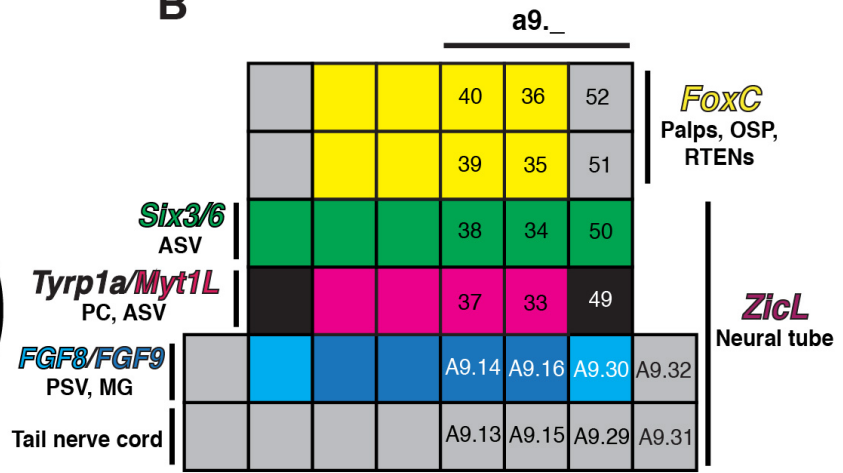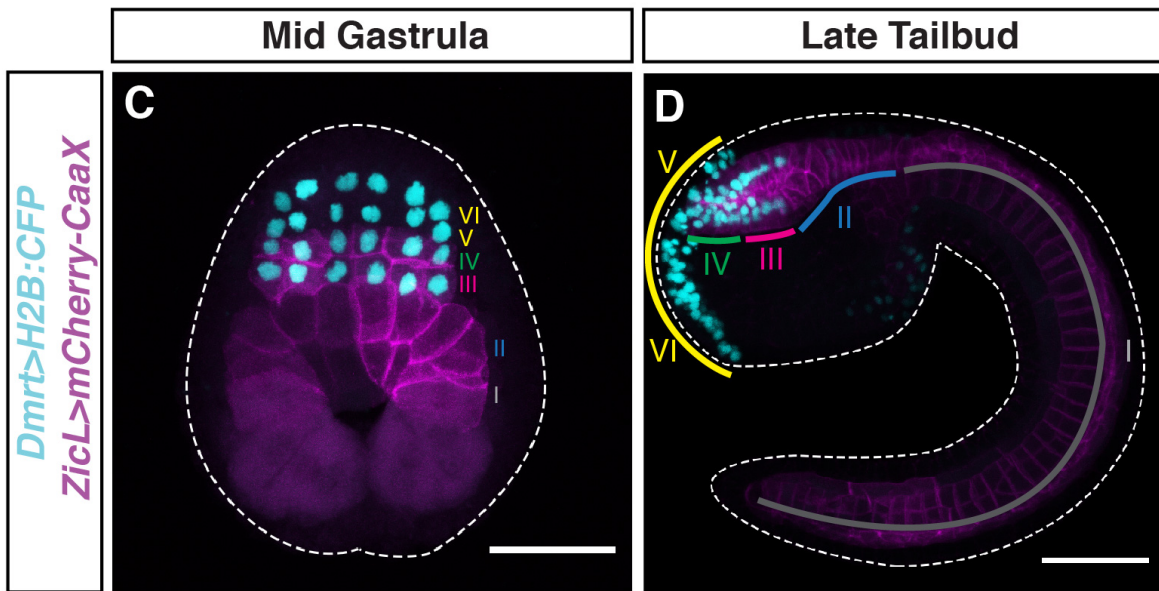

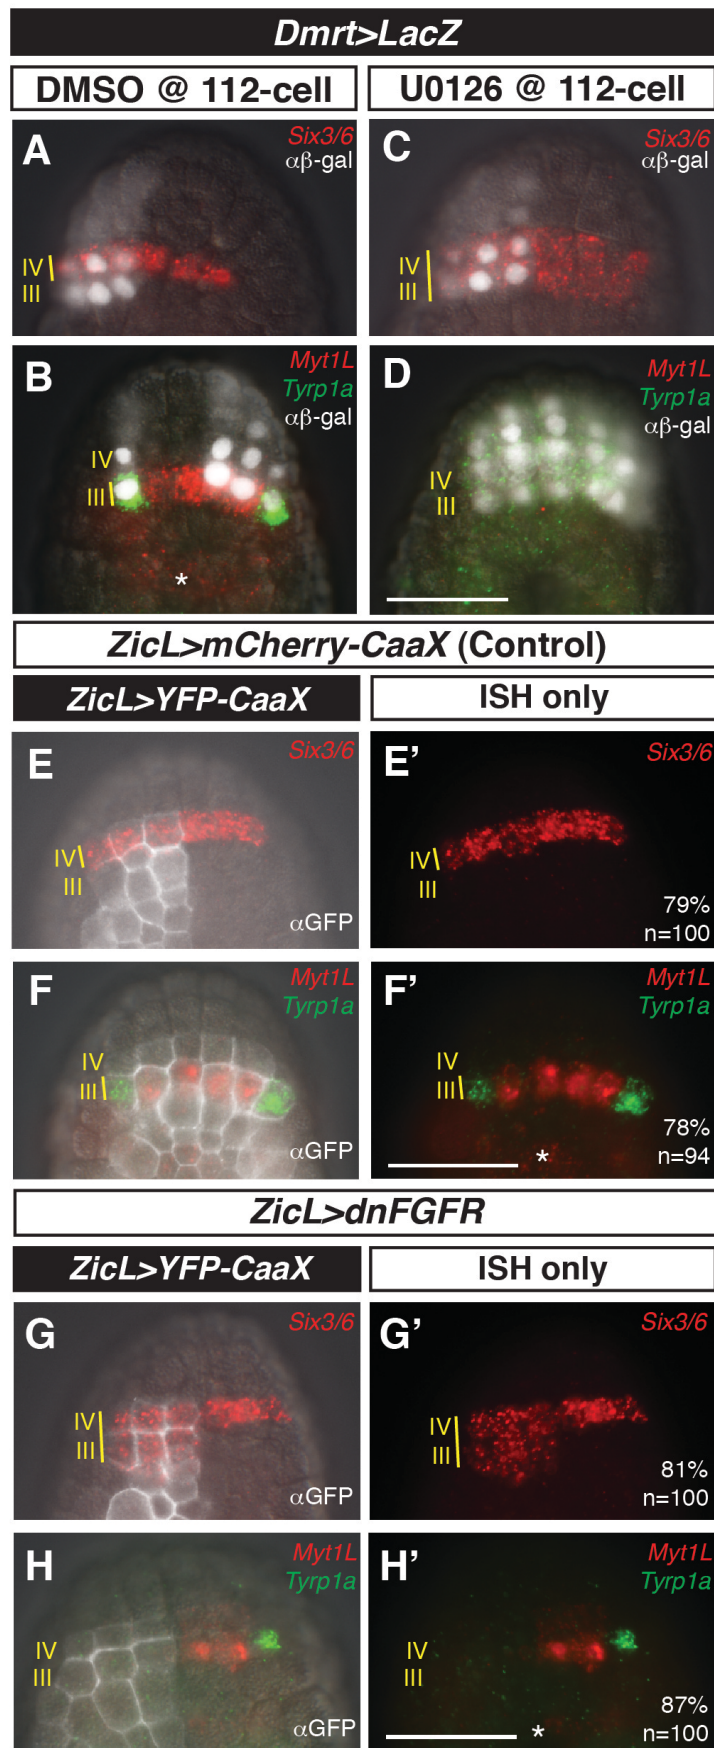

Gainous et al., Figure 2



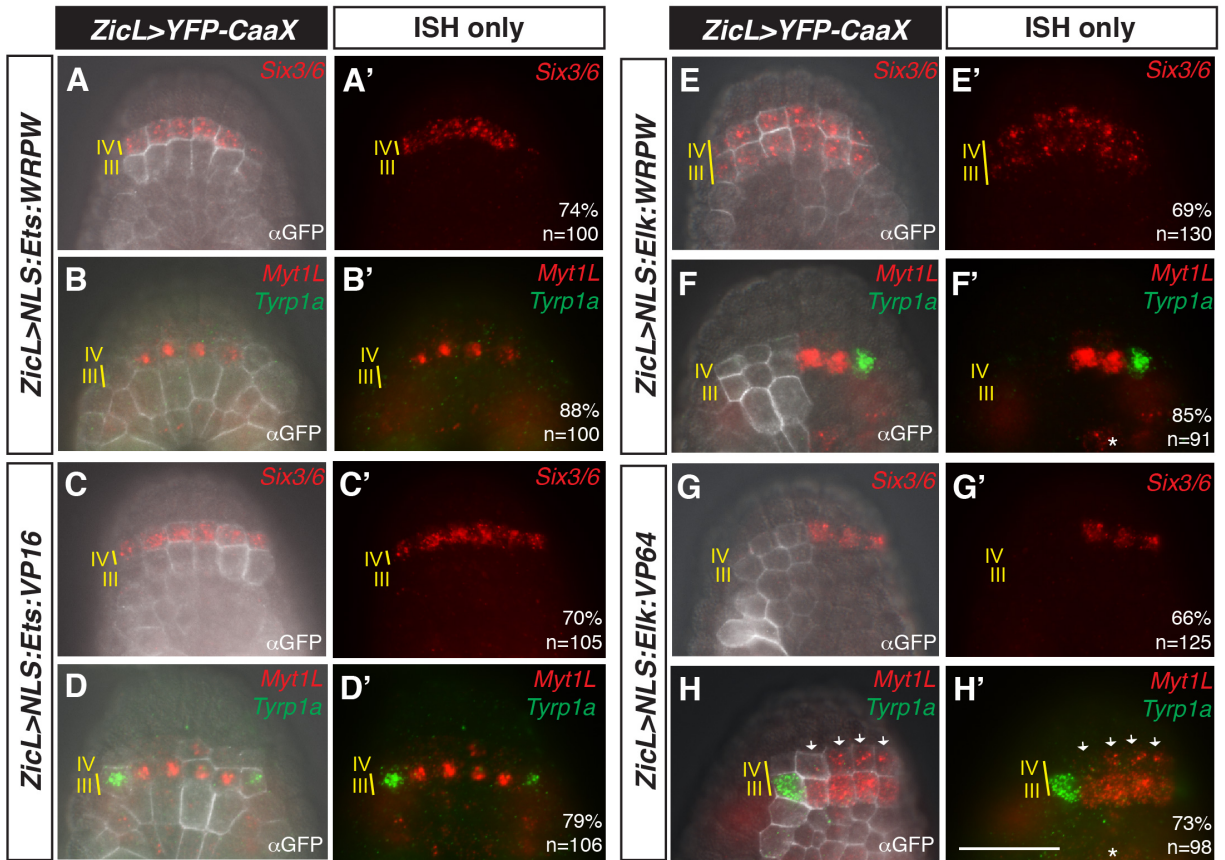

Gainous et al., Figure 3

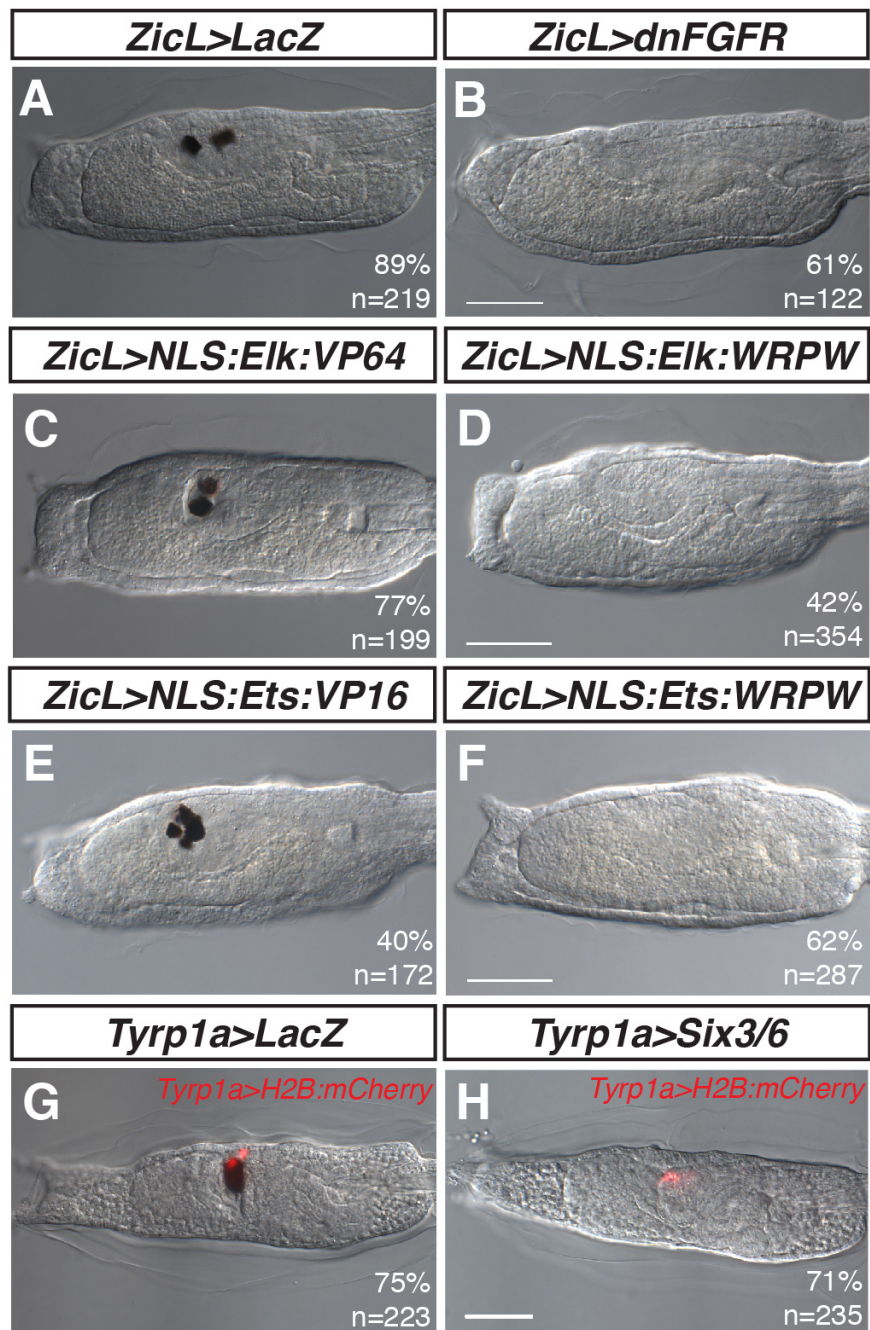

Gainous et al., Figure 4

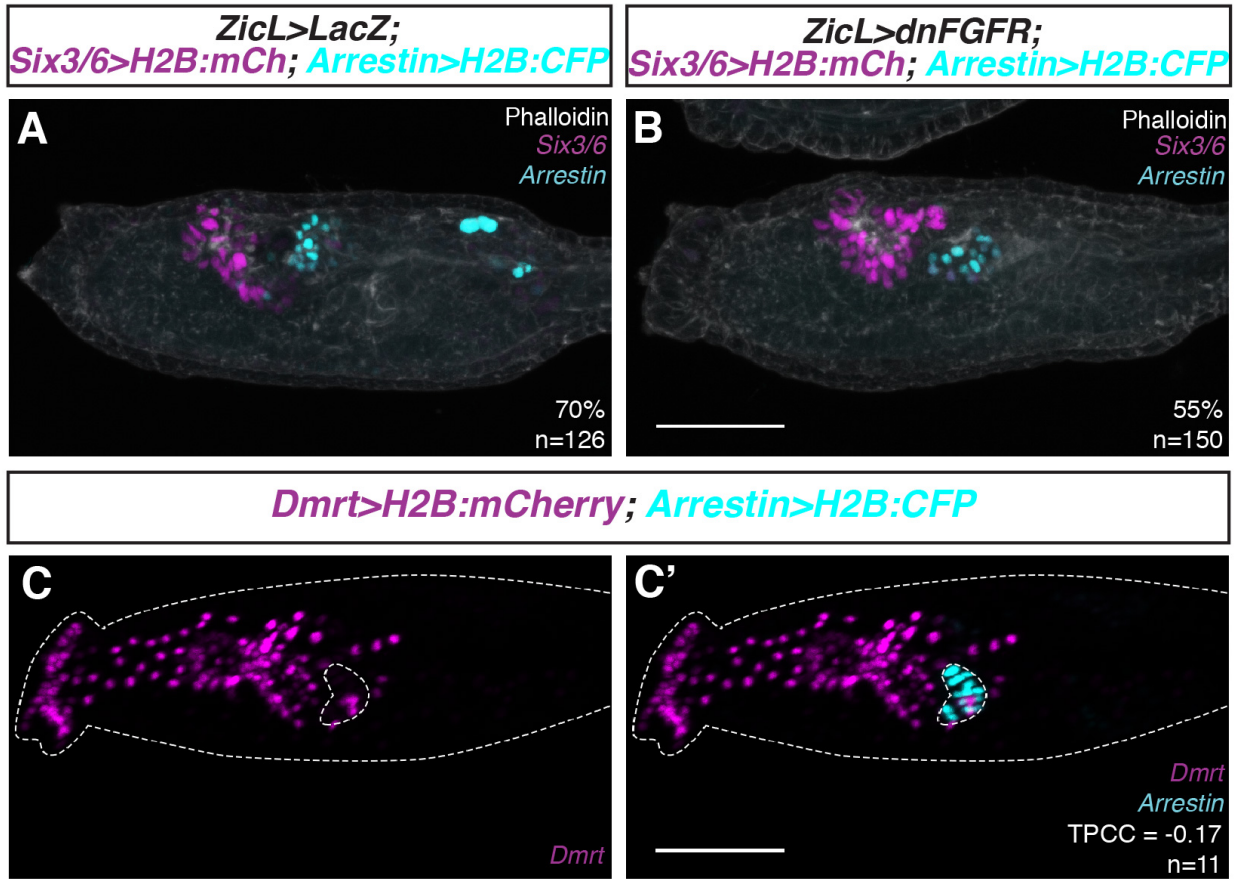

Gainous et al., Figure 5

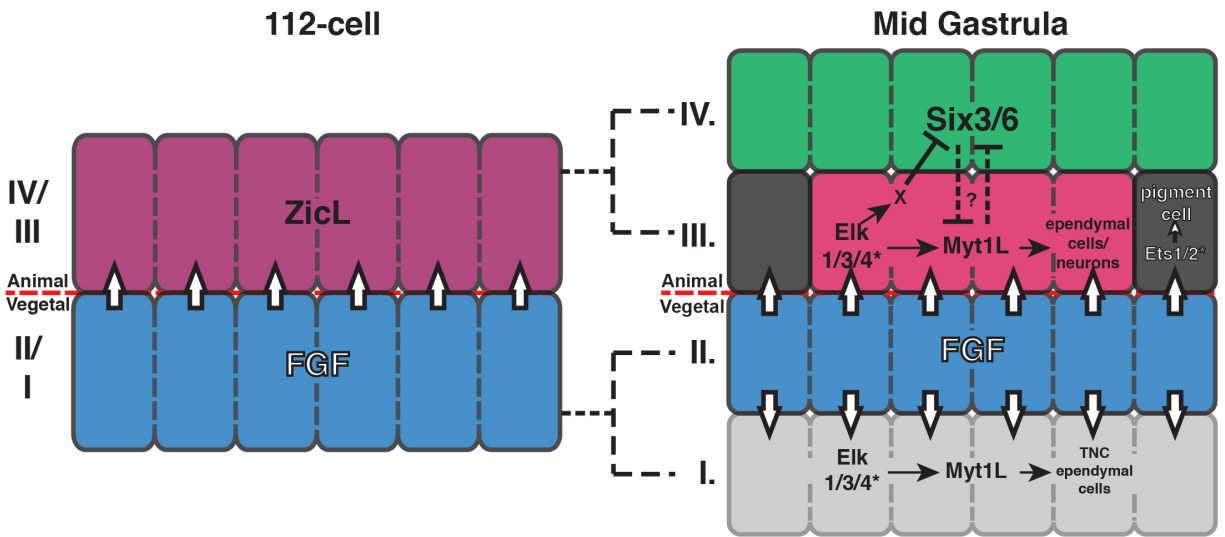

Gainous et al., Figure 6

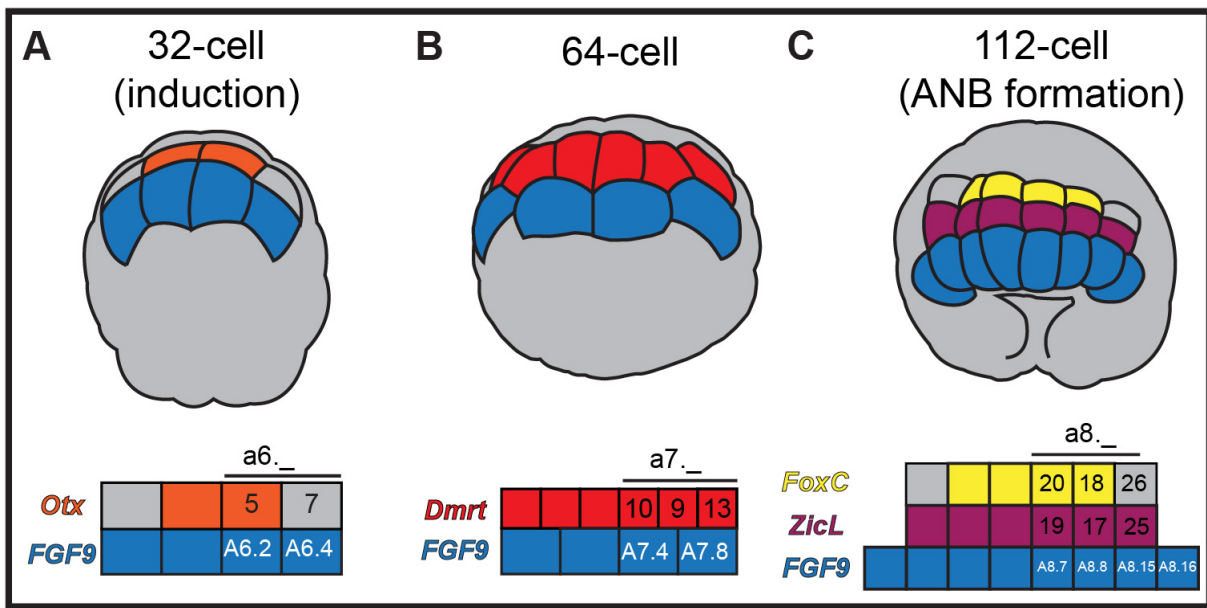

Gainous et al., Supplementary Figure 1

*Dmrt>H2B:YFP; ZicL>LacZ*  
*Six3/6 ISH Mid-Gastrula*

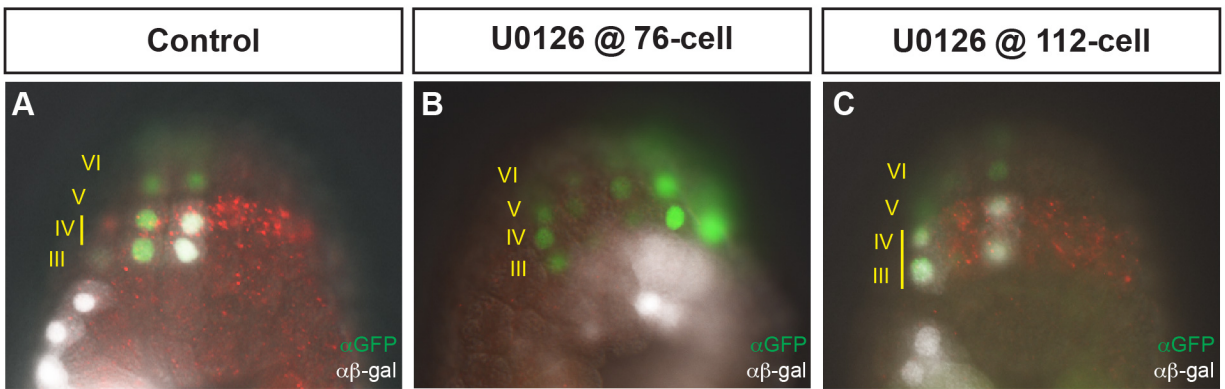



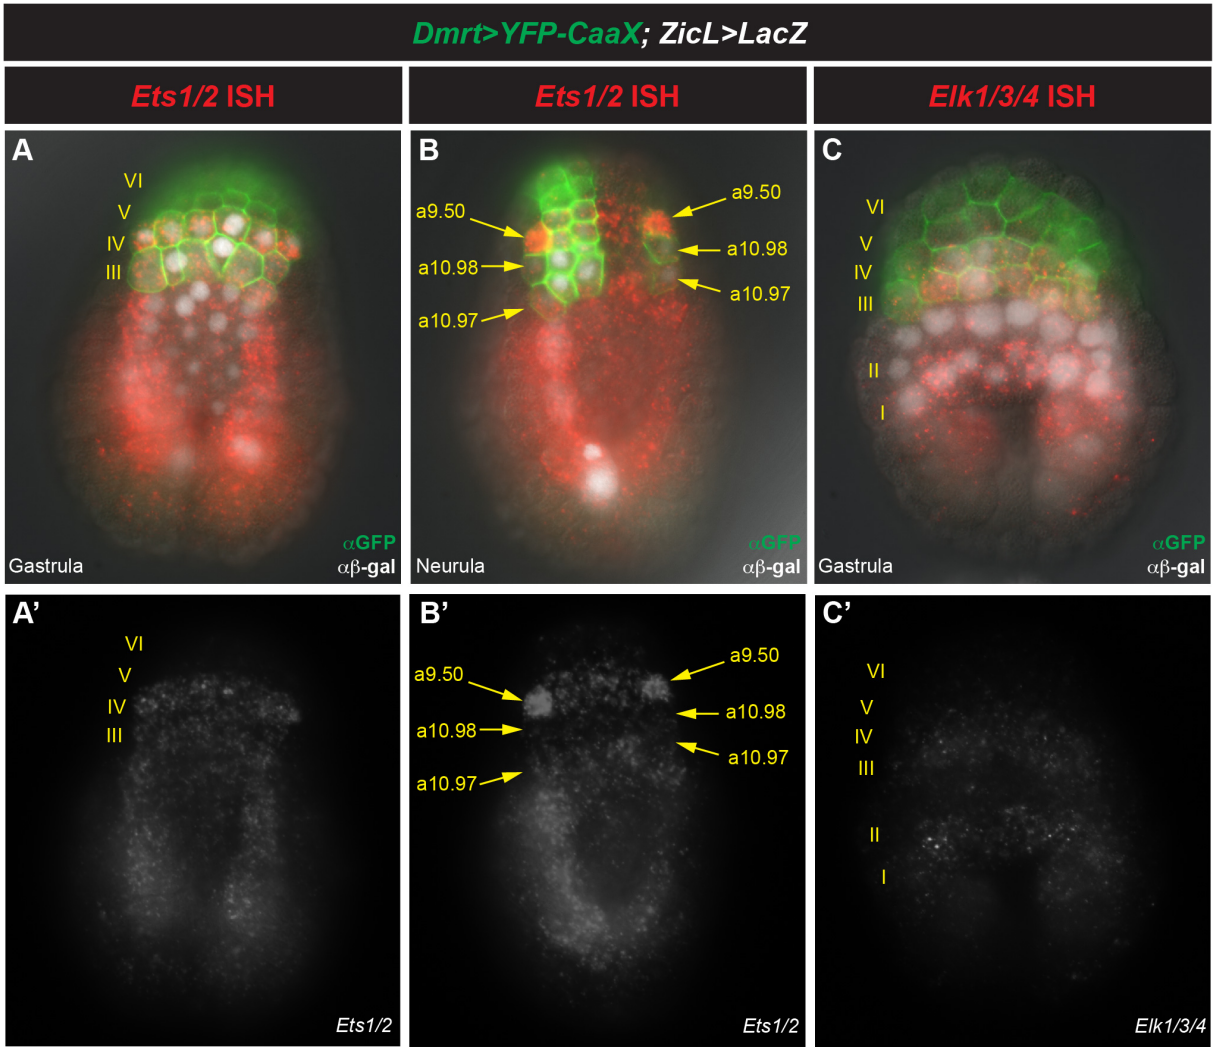

Gainous et al., Supplementary Figure 3

**A**

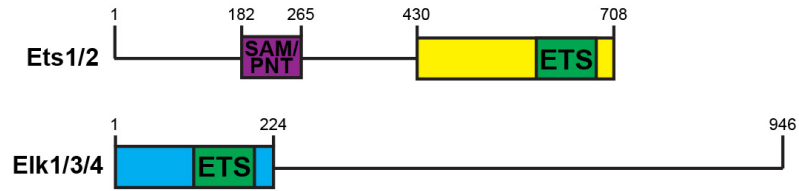

**B**

```

Ci-Ets1/2      1 MVDQHVVPSSFDINIPSNINIKPDDDFDNDLDFDKLSNEDFSSPEDFVSTPVLDDFLP
Ci-Elk1/3/4   1 MMTLKIDTADFDR--SSIEQQQODG-----
consensus     1 * . . . ** . . * * * * . . . . .

Ci-Ets1/2     61 DLNHCSEIKQSSFDKQIAYENLSAHDASHIQNESTEYSSSYNGKHEVCTPVKNYPGKGD
Ci-Elk1/3/4   25 -----KCNNSGHKS-----TE
consensus     61 . . . . . * * * * . . . . .

Ci-Ets1/2     121 ICNITPNVTPRSAQKSMGPTLEELTGLPEKLAPEDVPKTFPLFLITPGTGAKMNDAITQ
Ci-Elk1/3/4   36 TR---NVTD-----SAVENDRIKS
consensus     121 . . . . . * * * . . . . . * * *

Ci-Ets1/2     181 SFSSFRNIMEANSMKDKLWSAPQVKTWARWIAQEFISPSLDESNFICISGMMCSLRKE
Ci-Elk1/3/4   52 SD-----PEKGLLD--RENDGSPSLDRSSMVNM-----
consensus     181 * . . . . . * . . . . . * * * * . . . . .

Ci-Ets1/2     241 SFLHLCPPFVGEILWEHLDRLQSECGNDTRIPECSNLNQNNDKISSSTTPQNPPSCTTNP
Ci-Elk1/3/4   79 -----EELDM-----
consensus     241 . . . . . * . . . . .

Ci-Ets1/2     301 PYPTRPAPPYTKNPSFNQPIQNHFSLDQPPQFKEERYRQHLDTPSHFNPIDAPPVDMSS-
Ci-Elk1/3/4   84 -----QAPPSSDKRI-----
consensus     301 . . . . . * * * * . . . . .

Ci-Ets1/2     360 CVKREQLPHYPSHAFPVNTNRRNFSFEHSMNIKPEPMSHINAFDMHRQMSHPHKPNQRFQ
Ci-Elk1/3/4   93 CL-----ANMQQLG-----
consensus     361 * . . . . . * . . . . . * *

Ci-Ets1/2     420 MHMENRRSSEPIITPLKPFYRHRPLSQOMSHFPPTPTTPNAPELPGHPMHLPPHEMGGQQ
Ci-Elk1/3/4   102 AHLPR-----
consensus     421 * . . . . .

Ci-Ets1/2     480 NLQDLYYINIASLRHHQIETMKRHMAKGIQOTITNRSFGDQOVNOHMLSRSDSVGV
Ci-Elk1/3/4   107 -----
consensus     481 . . . . .

Ci-Ets1/2     540 NGNGKNGINGLLTPEPEDEFGGFMOHSRMNSCMTONTTAEFSPNPVIGPAGLITGYNGSGPI
Ci-Elk1/3/4   107 -----VL-----DMNV
consensus     541 . . . . .

Ci-Ets1/2     600 QLWOFLELELIDRS-CQHEVTTTGDGWEFKMIDPEVARRRGRKKNPKMNYEKLSEGLR
Ci-Elk1/3/4   113 TLWOFLELELMDPSSNSHLISWTSADGEFKLHNSEEVARLWGLRKNKTNMNYDKLSRALR
consensus     601 ***** * * * . . * * * * * . . . . . * * * * * * * * * * * * * * * * *

Ci-Ets1/2     659 YYYDKNIIOKTAGRRYVYRFVCDLOS-----
Ci-Elk1/3/4   173 YYYDKNIIKKVNGQKQVYKFSFPEIKTETKIPFRVKMERLTONENGOGGIDDDDEGDP
consensus     661 ***** * * * . . * * *

Ci-Ets1/2     685 -----
Ci-Elk1/3/4   233 PSPTPSSSPSMVVGSRDVTEDYRYFIQRQEQAEKLEQAEKRKRLSHQNEQEQEQRRQL
consensus     721 . . . . .

Ci-Ets1/2     685 ---LLGYSPT-----
Ci-Elk1/3/4   293 KQLNYSNYSPTQSPADNWRHREMAEESHATGSLQHATRSVEDVARMSLGAASSAAAAA
consensus     781 . . . . . * * * * . . . . .

Ci-Ets1/2     693 -----
Ci-Elk1/3/4   353 AAALSATQEEARNAATAAFWAGFRQAAAAAVVASTSKPEDPLLTQRYLQAGERQNSGR
consensus     841 . . . . .

Ci-Ets1/2     693 -----LHSMLDVKP-----
Ci-Elk1/3/4   413 KYHTESPPINPRGWRHNSNNHRSNTHSYRQQQHNDRKYKHDRLSPPYPTQFHKSRKSP
consensus     901 . . . . . * *

```

```

Ci-Ets1/2      702 EDRLSD-----
Ci-Elk1/3/4   473 KDTVSYQQYLQQYEKDYLSMSHHRFKEQPEHTPEELINHNKKALAEAFMARAPQINKP
consensus      961 * . * .....

Ci-Ets1/2      708 -----
Ci-Elk1/3/4   533 RPRSPYSSGQRRYPGEDDVMVRRRDPFLFCSRLEQDDIPASSNRSSIELKRPKMECSQ
consensus     1021 .....

Ci-Ets1/2      708 -----
Ci-Elk1/3/4   593 ISSNAFPFADNFSSYSRELVGKSPPLPRPFDERNEHAESTLAMLNMGHNSAPIENTSNTN
consensus     1081 .....

Ci-Ets1/2      708 -----
Ci-Elk1/3/4   653 TLKRNSLNEAPLDLCTSPKASNSPPGSPRALSPMLKHSPPVSSMDGDTSRTEEKRKSPEL
consensus     1141 .....

Ci-Ets1/2      708 -----
Ci-Elk1/3/4   713 LPAPFQREDEELEKTKQDSGFVTPQKRRLTGKKSIDRKPSPIDLSKPTRTEADYMDGIS
consensus     1201 .....

Ci-Ets1/2      708 -----
Ci-Elk1/3/4   773 SALYAQFPGIRGSSLLSHDGKSIPTDAVSRKTPSDTNATFFPTSVIMTPSPMVIPTIF
consensus     1261 .....

Ci-Ets1/2      708 -----
Ci-Elk1/3/4   833 WSTLSPMPHGLGKTDLLAGVREGCSSKSTNNDKDGEGEKDQKAGSVFQFPPTVVNGQMT
consensus     1321 .....

Ci-Ets1/2      708 -----D
Ci-Elk1/3/4   893 FAGVPVRPIAALGQPIPANQVSSVASQLTSHMTGVASPLNLVSSSAVTTLTSS
consensus     1381 .....

```

Gainous et al., Supplementary Figure 4

## References

- Armougom, F., Moretti, S., Poirot, O., Audic, S., Dumas, P., Schaeli, B., Keduas, V. and Notredame, C. (2006). Espresso: automatic incorporation of structural information in multiple sequence alignments using 3D-Coffee. *Nucleic Acids Res.* 34, W604-W608.
- Schultz, J., Milpetz, F., Bork, P. and Ponting, C.P. (1998). SMART, a simple modular architecture research tool: identification of signaling domains. *Proc. Natl. Acad. Sci. USA* 95, 5857-5864.
